# Supplementary material for: The effect of the alpha-specific PI3K inhibitor alpelisib combined with anti-HER2 therapy in HER2+/PIK3CA mutant breast cancer
Source: PubMed Central journal article supplement (PMC10353540; doi:10.3389/fonc.2023.1108242), 2023-07-04

**Supplementary Figure S1.** Bar chart representing the functionally enriched gene ontology terms associated with resistance to alpelisib (AR) and alpelisib + trastuzumab (ATR) in HER2+/PIK3CA mutant breast cancer cell lines.

- Gene ontology enrichment in KPL4 AR versus KPL4 treated with alpelisib for 48 hours**

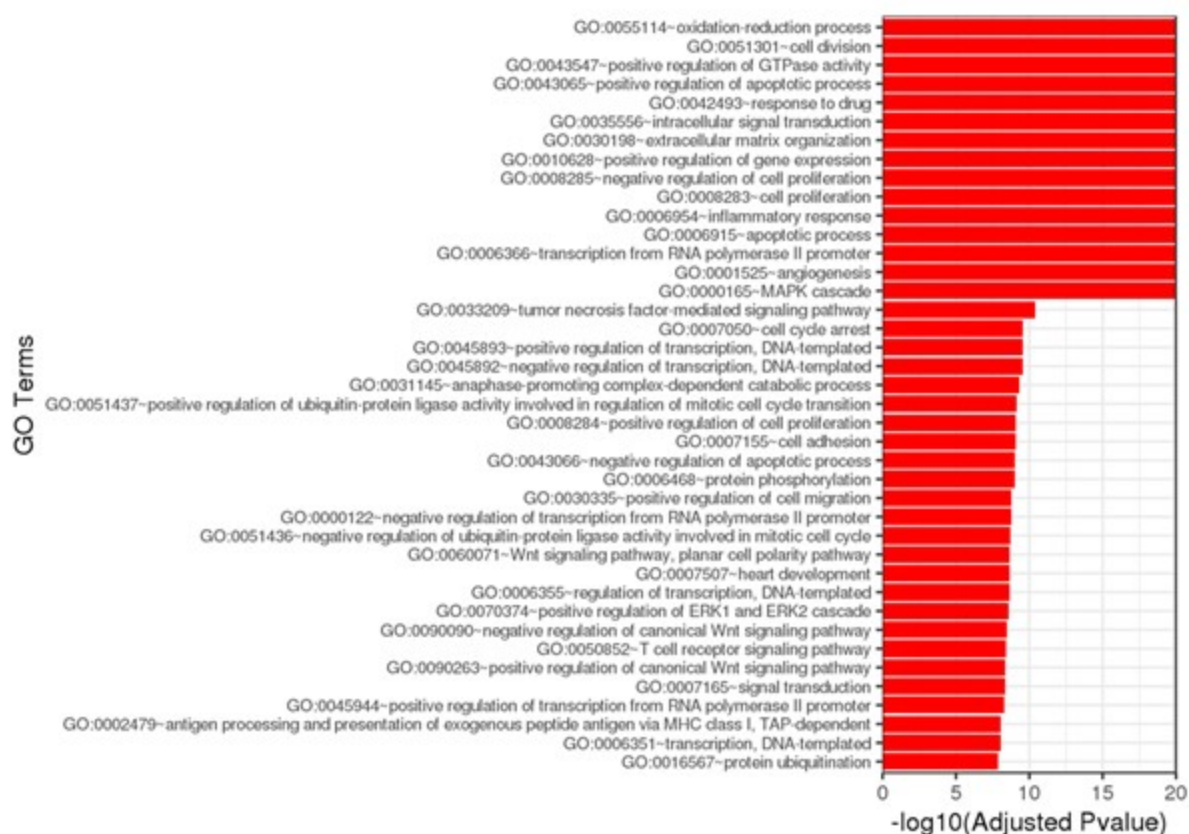

- Gene ontology enrichment in KPL4 ATR versus KPL4 treated with alpelisib plus trastuzumab for 48 hours

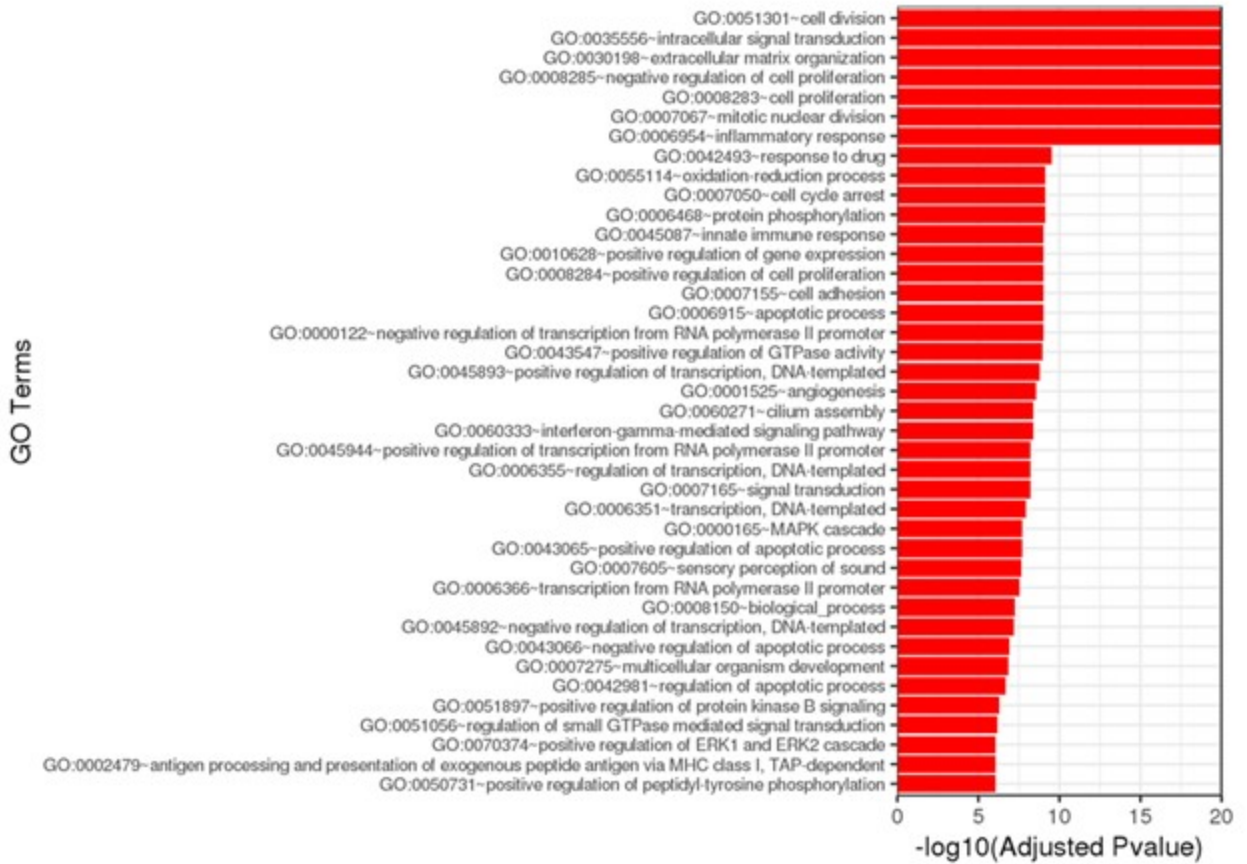

- Gene ontology enrichment in HCC1954 AR versus Hcc1954 treated with alpelisib for 48 hours

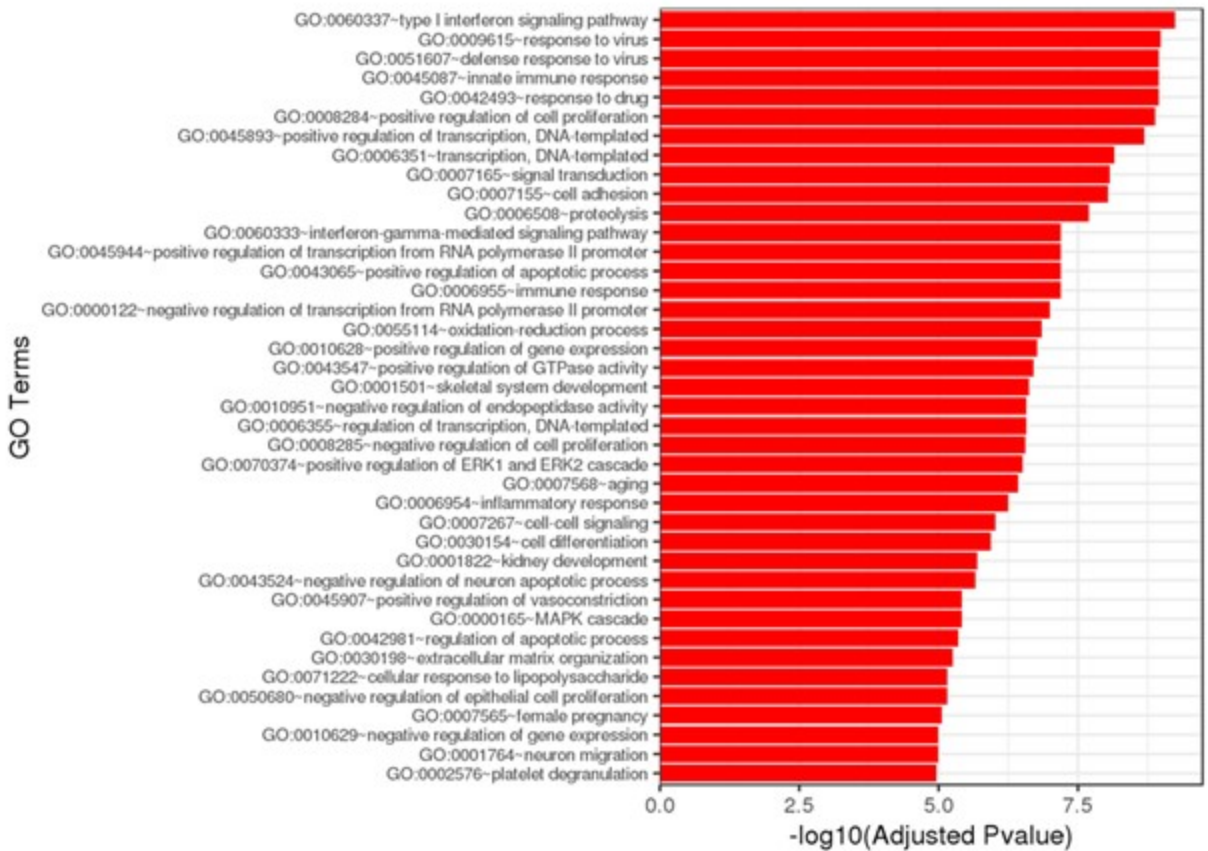

- Gene ontology enrichment in HCC1954 ATR versus HCC1954 treated with alpelisib plus trastuzumab for 48 hours

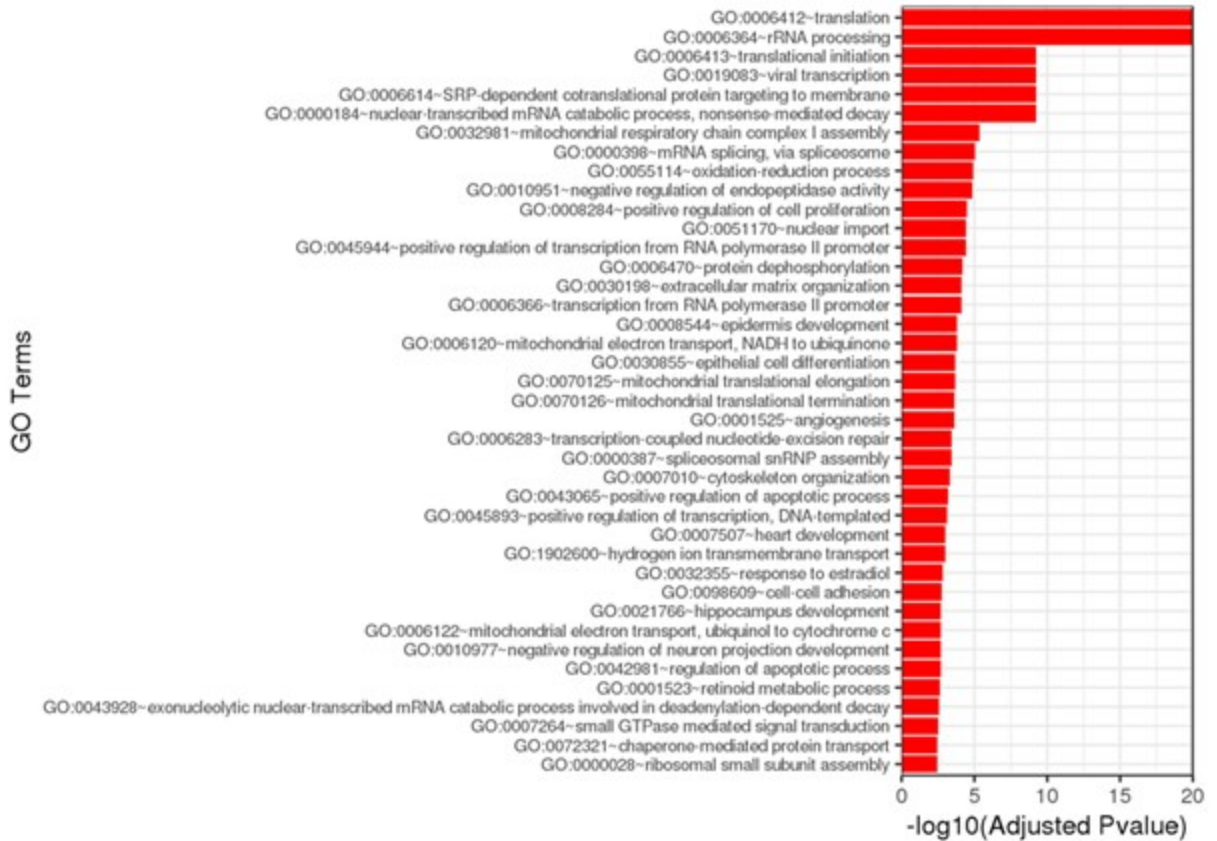

Supplement: Image_1.pdf [file Image_1.pdf]
